# Supplementary material for: Body Mass Index at Accession and Incident Cardiometabolic Risk Factors in US Army Soldiers, 2001–2011
Source: PLOS journal article supplement (doi:10.1371/journal.pone.0170144), 2017-01-17
Supplement: S5 (10.1371/journal.pone.0170144.s005) [file journal.pone.0170144.s005]

## Supporting Information

Hruby, *et al.* Body Mass Index at Accession and Incident Cardiometabolic Risk Factors in US Army Soldiers, 2001–2011.

**S5 Table.** Hazard Ratios (95% Confidence Intervals) of Broadly Defined Incident Cardiometabolic Risk Factors across Standard Table Weight Categories at Accession among 731,014 US Army Entrants, 2001–2011.

| Standard Table Weight Category    |                         |              |                  |                   |                  |
|-----------------------------------|-------------------------|--------------|------------------|-------------------|------------------|
| Outcome                           | Model*                  | Total Events | Under Criteria   | Meet Criteria     | Exceed Criteria  |
| Metabolic syndrome (single code)  | <i>Events</i>           | 228          | 0                | 71                | 157              |
|                                   | <i>Follow-up Time**</i> |              | 233,892          | 21,229,021        | 8,018,132        |
|                                   | <i>Crude Rate**</i>     |              | 0.000            | 0.0003            | 0.0020           |
|                                   | Model 1                 |              | --               | 1 ( <i>ref.</i> ) | 5.84 (4.40–7.75) |
|                                   | Model 2                 |              | --               | 1 ( <i>ref.</i> ) | 5.72 (4.30–7.59) |
|                                   |                         |              |                  |                   |                  |
| Overweight/obesity†               | <i>Events</i>           | 5,361        | 19               | 4,210             | 1,132            |
|                                   | <i>Follow-up Time</i>   |              | 233,529          | 15,895,587        | 441,842          |
|                                   | <i>Crude Rate</i>       |              | 0.008            | 0.026             | 0.256            |
|                                   | Model 1                 |              | 0.30 (0.19–0.47) | 1 ( <i>ref.</i> ) | 3.83 (3.55–4.14) |
|                                   | Model 2                 |              | 0.30 (0.19–0.47) | 1 ( <i>ref.</i> ) | 3.78 (3.50–4.08) |
|                                   |                         |              |                  |                   |                  |
| Impaired glucose/insulin disorder | <i>Events</i>           | 3,880        | 28               | 2,206             | 1,646            |
|                                   | <i>Follow-up Time</i>   |              | 233,391          | 21,182,952        | 7,991,029        |
|                                   | <i>Crude Rate</i>       |              | 0.012            | 0.010             | 0.021            |
|                                   | Model 1                 |              | 1.28 (0.88–1.86) | 1 ( <i>ref.</i> ) | 1.81 (1.70–1.94) |
|                                   | Model 2                 |              | 1.28 (0.88–1.87) | 1 ( <i>ref.</i> ) | 1.79 (1.68–1.91) |
|                                   |                         |              |                  |                   |                  |
| Hypertension                      | <i>Events</i>           | 2,602        | 71               | 14,579            | 11,723           |
|                                   | <i>Follow-up Time</i>   |              | 232,667          | 20,879,443        | 7,756,939        |
|                                   | <i>Crude Rate</i>       |              | 0.031            | 0.070             | 0.151            |
|                                   | Model 1                 |              | 0.54 (0.43–0.69) | 1 ( <i>ref.</i> ) | 2.19 (2.13–2.24) |
|                                   | Model 2                 |              | 0.54 (0.43–0.68) | 1 ( <i>ref.</i> ) | 2.18 (2.13–2.24) |
|                                   |                         |              |                  |                   |                  |

## Supporting Information

Hruby, *et al.* Body Mass Index at Accession and Incident Cardiometabolic Risk Factors in US Army Soldiers, 2001–2011.

|              |                       |        |                  |                   |                  |
|--------------|-----------------------|--------|------------------|-------------------|------------------|
| Dyslipidemia | <i>Events</i>         | 13,404 | 31               | 7,500             | 5,873            |
|              | <i>Follow-up Time</i> |        | 233,481          | 21,068,528        | 7,899,345        |
|              | <i>Crude Rate</i>     |        | 0.013            | 0.036             | 0.074            |
|              | Model 1               |        | 0.56 (0.40–0.80) | 1 ( <i>ref.</i> ) | 2.16 (2.08–2.23) |
|              | Model 2               |        | 0.57 (0.40–0.81) | 1 ( <i>ref.</i> ) | 2.12 (2.05–2.20) |

\*Model adjustments as follows: Model 1 was adjusted for age at baseline (<20, 20–<30, 30–<40, 40+ years) and sex. Model 2 was adjusted as for Model 1, plus the following demographic covariates: race/ethnicity (white, black, Hispanic, Asian/Pacific Islander, Indian/Alaskan, other/unknown), educational attainment (<high school, some college/college, advanced degree, other/unknown), and marital status (never married, married, divorced/separated/widowed, other/unknown). Standard Table Weights are adapted from US Department of the Army. Standards of Medical Fitness, Army Regulation 40-501. US Department of the Army, Washington, D.C.; Available at: [http://armypubs.army.mil/epubs/40\\_Series\\_Collection\\_1.html](http://armypubs.army.mil/epubs/40_Series_Collection_1.html).

\*\*Expressed as/in person-months.

†Among those with body mass index <25 kg/m<sup>2</sup> at baseline/accession, N=408,216.
